# Supplementary material for: Spatial regulation of rice leaf morphology by miRNA-targets complexes during viral infection
Source: Research Square preprint supplement (doi:10.21203/rs.3.rs-5045268/v1), 2024-09-20
Supplement: Supplementary file 1 [file 104878c459148f3746f9282c.xlsx]

## Sheet: Sheet1
Table S1. Accession numbers of the rice genes mentioned in this paper
gene name	RAP_Locus	MSU_Locus
OsCUC1	Os06g0344900	LOC_Os06g23650
OsCUC3	Os08g0511200	LOC_Os08g40030
OMTN1	Os02g0579000	LOC_Os02g36880
OMTN2	Os04g0460600	LOC_Os04g38720
OMTN3	Os12g0610600	LOC_Os12g41680
OMTN4	Os06g0675600	LOC_Os06g46270
OMTN6	Os08g0200600	LOC_Os08g10080
OsPCF5; OsTCP1	Os01g0213800	LOC_Os01g11550
OsPCF7	Os01g0755500	LOC_Os01g55100
OsTCP2	Os01g0763200	LOC_Os01g55750
OsTCP3	Os01g0924400	LOC_Os01g69980
OsTCP4	Os02g0635800	LOC_Os02g42380
OsTCP5	Os02g0747400	LOC_Os02g51280
OsTCP6		LOC_Os02g51310
OsTB1; FC1	Os03g0706500	LOC_Os03g49880
OsPCF6; OsTCP8	Os03g0785800	LOC_Os03g57190
PCF1	Os04g0194600	LOC_Os04g11830
OsTCP10	Os04g0526000	LOC_Os04g44440
OsTCP11	Os05g0513100	LOC_Os05g43760
OsTCP19	Os06g0226700	LOC_Os06g12230
OsTCP13		LOC_Os07g04510
OsTCP21; OsTCP14	Os07g0152000	LOC_Os07g05720
OsTCP15; TIG1	Os08g0432300	LOC_Os08g33530
PCF2	Os08g0544800	LOC_Os08g43160
REP1; OsTCP17	Os09g0410500	LOC_Os09g24480
OsTCP18	Os09g0521300	LOC_Os09g34950
PCF3; OsTCP19	Os11g0175700	LOC_Os11g07460
OsTCP20		LOC_Os12g02090
OsTCP21	Os12g0173300	LOC_Os12g07480
OsPCF8; OsTCP22	Os12g0616400	LOC_Os12g42190
OsSPL1	Os01g0292900	LOC_Os01g18850
OsSPL2	Os01g0922600	LOC_Os01g69830
OsSPL3	Os02g0139400	LOC_Os02g04680
OsSPL4	Os02g0174100	LOC_Os02g07780
OsSPL5	Os02g0177300	LOC_Os02g08070
OsSPL6	Os03g0833300	LOC_Os03g61760
OsSPL7	Os04g0551500	LOC_Os04g46580
OsSPL8	Os04g0656500	LOC_Os04g56170
OsSPL9	Os05g0408200	LOC_Os05g33810
OsSPL10	Os06g0659100	LOC_Os06g44860
OsSPL11	Os06g0663500	LOC_Os06g45310
OsSPL12	Os06g0703500	LOC_Os06g49010
OsSPL13	Os07g0505200	LOC_Os07g32170
OsSPL14	Os08g0509600	LOC_Os08g39890
OsSPL15	Os08g0513700	LOC_Os08g40260
OsSPL16	Os08g0531600	LOC_Os08g41940
OsSPL17	Os09g0491532	LOC_Os09g31438
OsSPL18	Os09g0507100	LOC_Os09g32944
OsSPL19	Os11g0496600	LOC_Os11g30370
