# Supplementary material for: Spatial regulation of rice leaf morphology by miRNA-targets complexes during viral infection
Source: Research Square preprint supplement (doi:10.21203/rs.3.rs-5045268/v1), 2024-09-20
Supplement: Supplementary file 2 [file 567f98d02ea61bc107c2ff57.xlsx]

## Sheet: Sheet1
Table S2. FPKM data from small RNA sequencing results, relative to Fig. S2a
miRNA	Mock 7dpi	Mock 14dpi	Mock 21dpi	RRSV 7dpi	RRSV 14dpi	RRSV 21dpi
osa-miR156a	477.775	451.342	550.978	108.041	302.789	438.923
osa-miR156b-3p	1.75036	3.76467	2.70345	0.687723	2.46862	1.6457
osa-miR156b-5p	477.994	453.433	550.377	108.248	302.704	438.992
osa-miR156c-3p	15.3886	44.9669	18.9993	10.7285	18.4721	9.73708
osa-miR156c-5p	477.994	453.433	550.377	108.248	302.704	438.992
osa-miR156d	1214.24	1461.42	1057.42	404.106	824.265	868.246
osa-miR156e	477.775	451.342	550.978	108.041	302.789	438.992
osa-miR156f-3p	5.68866	16.1044	4.50575	3.43862	6.46949	4.38855
osa-miR156f-5p	1211.39	1457.45	1055.4	402.593	822.477	866.669
osa-miR156g-3p	15.3886	45.0714	18.9242	10.7285	18.4721	9.73708
osa-miR156g-5p	477.994	453.433	550.377	108.248	302.704	438.992
osa-miR156h-3p	5.68866	16.1044	4.50575	3.43862	6.46949	4.38855
osa-miR156h-5p	1211.39	1457.45	1055.4	402.593	822.477	866.669
osa-miR156i	477.775	451.342	550.978	108.041	302.789	438.992
osa-miR156j-3p	1113.37	1710.73	965.582	1049.95	1237.04	787.538
osa-miR156j-5p	1211.47	1457.66	1056.15	402.593	822.477	867.218
osa-miR156k	1.31277	0.836593	0.675863	0.206317	0.51075	1.09714
osa-miR156l-3p	5.324	14.5358	3.82989	3.02598	6.04387	3.77141
osa-miR156l-5p	2.18795	3.34637	1.27663	0.756496	1.87275	0.617139
osa-miR159a.1	17134.8	14917.4	9922.26	15660.3	13984.7	9592.88
osa-miR159a.2	12.1796	3.45094	24.4812	3.57616	19.1531	140.159
osa-miR159b	17134.8	14917.4	9922.26	15660.2	13984.7	9592.88
osa-miR159c	18.3058	4.49669	13.8176	9.49058	18.2167	13.7828
osa-miR159d	18.3788	4.60126	13.8176	9.49058	18.387	13.5085
osa-miR159e	18.4517	4.49669	13.5923	9.42181	18.2167	13.4399
osa-miR159f	395.8	200.573	196.225	395.716	587.958	338.467
osa-miR164a	3290.75	1962.54	2625.88	1835.19	1851.98	2341.22
osa-miR164b	3289.51	1962.65	2626.55	1834.16	1851.3	2341.84
osa-miR164c	2.84433	1.46404	1.8023	1.51299	1.0215	2.19427
osa-miR164d	299.384	182.482	574.033	204.116	309.259	640.865
osa-miR164e	7.51195	3.34637	6.23296	3.9888	5.87362	5.00568
osa-miR164f	3292.06	1964.42	2637.29	1835.67	1852.06	2350.13
osa-miR166a-3p	19672.2	6889.76	10715.1	12990.3	10498.9	10194.6
osa-miR166a-5p	5.17814	7.73848	14.4935	9.14672	2.21325	12.3428
osa-miR166b-3p	19616.1	6842.6	10664.7	12954	10470.5	10139.5
osa-miR166b-5p	46.0198	54.6922	101.83	56.8059	43.4988	100.182
osa-miR166c-3p	18563.5	5798	10085.6	11208.6	9935.78	9962.48
osa-miR166c-5p	9.33524	8.8888	78.7755	9.35304	30.9855	90.0338
osa-miR166d-3p	19672.2	6889.76	10715.1	12990.4	10498.8	10194.6
osa-miR166d-5p	87.372	77.3848	370.448	77.2313	48.6063	272.433
osa-miR166e-3p	13.5653	3.03265	6.68353	11.6913	6.98024	10.2857
osa-miR166e-5p	3.9383	5.647	10.1379	7.84005	1.61737	8.22852
osa-miR166f	19659.7	6874.49	10708.5	12983.7	10496.1	10189.9
osa-miR166g-3p	1839.04	1389.58	1400.54	2321.96	1243.59	1261.5
osa-miR166g-5p	3.71951	1.04574	50.0138	2.54458	2.724	78.9252
osa-miR166h-3p	557.854	204.861	281.234	339.598	314.281	277.095
osa-miR166h-5p	13.2006	4.07839	4.58085	15.1299	4.51162	7.54281
osa-miR166i-3p	41.7169	38.2741	42.5043	55.7744	51.1601	46.4226
osa-miR166i-5p	1.82329	4.39211	22.4537	3.64493	8.08687	25.9884
osa-miR166j-3p	18592.4	5805.74	10095.1	11230.2	9947.27	9969.54
osa-miR166j-5p	6.12625	4.81041	74.3449	4.53897	10.7257	141.325
osa-miR166k-3p	14444.8	5082.3	6899.96	9510.59	7529.55	6466.86
osa-miR166k-5p	9.91869	4.39211	9.46208	15.405	3.23475	10.1485
osa-miR166l-3p	14536.6	5187.82	6976.86	9575.79	7563.01	6529.61
osa-miR166l-5p	23.6298	31.0585	52.7173	28.0591	12.8539	37.3026
osa-miR166m	225.577	94.0121	210.118	126.266	132.54	220.662
osa-miR172a	7.58488	6.58817	4.65594	9.28427	2.63887	4.18283
osa-miR172b	0.0729316	0	0.150192	0	0.17025	0
osa-miR172c	0.0729316	0	0	0.0687723	0	0
osa-miR172d-3p	7.58488	6.58817	4.65594	9.28427	2.63887	4.18283
osa-miR172d-5p	304.781	120.469	105.96	203.085	117.047	98.5366
osa-miR319a-3p	0.510521	0.104574	0.0750959	0	0.17025	0.068571
osa-miR319a-3p.2-3p	4.1571	0.313722	0.976246	0.343862	5.448	4.86854
osa-miR319b	8.89765	1.15031	11.9402	3.2323	9.95962	18.1027
osa-miR319a-5p	0	0	0.0750959	0	0	0.205713
osa-miR390-3p	80.8811	25.8298	904.229	39.7504	59.1618	803.035
osa-miR390-5p	544.434	418.61	697.415	386.982	64.8652	788.635
