# Supplementary material for: Spatial regulation of rice leaf morphology by miRNA-targets complexes during viral infection
Source: Research Square preprint supplement (doi:10.21203/rs.3.rs-5045268/v1), 2024-09-20
Supplement: Supplementary file 3 [file 798a0c2f18a75987d2dfe062.xlsx]

## Sheet: Sheet1
Table S4. FPKM data from RNA sequencing results, relative to Fig. S9
gene	Mock 7dpi	Mock 14dpi	Mock 21dpi	RRSV 7dpi	RRSV 14dpi	RRSV 21dpi
OsTAR2	3.23555	2.9745	1.05347	5.06977	4.1119	2.01855
OsYUCCA4	0	0.021416	0	0.045259	0.137038	0.027806
OsYUCCA1	1.37492	0.866797	0.617212	1.73653	0.668359	0.147339
OsYUCCA3	0.415145	0.328446	0.155137	0.281977	0.384239	0.248207
OsYUCCA3	0.415145	0.328446	0.155137	0.281977	0.384239	0.248207
OsNIT2	21.9482	10.3291	3.12829	21.7194	17.3818	6.94337
OsNIT1	6.25095	9.48944	23.0625	6.66	7.38703	20.8181
OsPIN1b	38.9696	31.475	33.2657	51.9073	32.0253	40.6708
OsAFB4	14.1286	14.3245	11.3893	14.1585	14.2134	14.3607
OsCOW1	1.95358	0.938083	0.281763	2.08896	0.89437	0.523715
OsASA2	33.358	23.555	46.1626	14.4125	29.0084	68.2299
OsASB2	5.40724	7.98096	10.6308	3.4025	9.7544	10.8646
OsAO1	24.2749	19.7964	21.2877	16.9409	32.5891	24.2218
OsASA1	12.3724	7.76649	1.77422	14.0314	8.21087	2.21829
OsYUCCA7	2.82985	1.98983	3.87933	2.94794	4.20979	1.68975
OsAFB2	22.5095	23.7055	16.6927	25.1697	24.7979	27.2315
OsASB1,OsTDD1	136.248	92.6757	83.9985	79.4846	103.831	96.4884
OsTIR1	7.30722	8.4228	9.23049	6.33112	11.2012	13.9864
OsTAR1	0	0	0	0	0	0
OsYUCCA2	0.495136	0.181658	0.024045	1.01952	0.168071	0
OsPIN10b	0	0	0	0	0.01968	0
OsAO3	5.27695	5.97294	8.43256	2.11329	5.57288	11.966
OsYUCCA6	0.789602	0.61	0.119882	0.784209	1.23245	0.321831
OsPIN5b	0.085725	0.525469	0.042568	0.182509	1.3011	0.332604
OsPIN5c	0.025182	0	0	0	0.07661	0
OsAO2	0	0	0	0	0	0
OsAFB3	9.26681	11.0233	11.2435	4.92092	9.0769	8.28077
OsYUCCA5	0.179175	0.05345	0.12663	0.432655	0.317201	0.212387
OsIAA1	27.4392	27.2663	22.0626	35.9463	24.5935	22.6855
OsIAA2	19.8021	17.9736	20.0431	16.2618	20.0193	16.0096
OsIAA4	19.8021	17.9736	20.0431	16.2618	20.0193	16.0096
OsIAA3	118.377	133.152	62.7552	126.92	111.661	56.2808
OsIAA5	62.4436	56.6772	49.7026	80.4443	66.2235	25.8349
OsIAA6	53.8679	40.9332	69.8318	45.0331	44.52	71.4543
OsIAA7	1.78481	2.15894	0.703445	1.70097	2.39019	0.826671
OsIAA8	8.86384	9.19803	5.21048	8.33989	9.62332	9.82667
OsIAA9	1.24906	0.786576	3.28787	2.47054	1.76244	0.994019
OsIAA10	143.16	123.629	84.9851	152.536	128.511	62.331
OsIAA11	0.218665	0.208569	0.127577	0.167425	0.563169	0.06688
OsIAA12	4.53394	6.10301	2.51604	8.60214	17.4662	6.61213
OsIAA13	60.9508	71.489	29.8739	51.3576	31.4202	8.63105
OsIAA14	7.88558	6.15139	2.04987	4.17778	4.63142	0.980466
OsIAA15	62.0524	66.7501	49.5237	89.4692	63.0888	32.5915
OsIAA16	1.68744	2.05614	0.379565	1.98449	3.52703	1.59441
OsIAA17	484.582	418.923	275.982	518.286	361.899	182.191
OsIAA18	6.7859	4.40223	7.50651	6.10712	4.76447	5.97325
OsIAA19	51.5345	37.3042	74.6215	53.1129	36.1525	60.1238
OsIAA20	0.28464	1.12221	0.127405	1.30501	2.29415	0.980715
OsIAA21	186.745	180.673	73.9085	172.877	133.825	32.8072
OsIAA22	0.591017	0.16275	0.110175	0.634312	0.712899	0.324734
OsIAA23	22.4533	13.0821	10.8042	26.3911	14.9917	11.4905
OsIAA24	93.5263	60.1691	50.581	135.502	54.0681	46.0158
OsIAA25	1.12344	5.07763	0.017953	0.137061	0.369719	0.103241
OsIAA26	0	0	0	0	0	0
OsIAA27	1.76819	3.05671	0.538034	1.10709	2.84853	0.425212
OsIAA28	0	0	0	0	0	0
OsIAA29	0	0	0	0	0	0
OsIAA30	24.8261	29.2913	3.45436	27.5033	17.1465	4.81379
OsIAA31	6.12778	11.6449	1.46154	5.08176	4.43013	3.93994
OsARF1	7.67988	6.97073	11.4516	4.90605	4.58911	4.1064
OsARF2	24.0348	15.3245	7.77811	21.3898	13.2036	5.17254
OsARF3	14.741	13.2097	8.86112	10.6087	13.3483	8.20676
OsARF4	79.2093	71.8409	166.39	70.9875	76.6349	148.162
OsARF5	13.915	20.6829	8.65984	15.9523	20.5233	8.73872
OsARF6	24.606	22.098	25.3075	31.5772	26.8454	54.7683
OsARF7	26.1534	30.7558	26.6873	28.9581	21.872	25.4428
OsARF8	15.0171	15.0074	7.9608	20.461	14.6074	11.0607
OsARF9	32.3139	17.1038	100.334	21.2713	15.3533	86.3186
OsARF10	9.80469	9.30699	5.03013	11.836	6.45524	4.44171
OsARF11	0.098207	0.14324	0.011312	0.033232	0.10739	0.24152
OsARF12	30.2848	24.6681	17.5581	23.5027	29.1417	40.5829
OsARF13	0.155185	0.223636	0.039941	0.137512	0.273032	0.159284
OsARF14	3.8594	2.97875	3.45901	3.53728	3.77999	2.13259
OsARF15	36.0268	30.3916	51.2717	29.4317	31.0327	35.0539
OsARF16	10.4132	12.6959	7.63536	3.17147	6.47652	5.45406
OsARF17	28.3965	42.3948	18.1811	45.7042	34.1372	38.2064
OsARF18	11.5422	10.8021	9.6138	12.2765	12.8127	7.29446
OsARF19	9.05526	7.17292	18.384	5.71486	5.34558	28.5179
OsARF20	0	0	0	0	0	0
OsARF21	34.336	39.5007	23.9792	30.4126	41.9064	19.0376
OsARF22	9.98503	10.6695	6.19838	11.3316	12.5721	9.91293
OsARF23	43.0487	35.5413	61.9074	36.7777	35.4905	46.6693
OsARF24	13.0303	15.2497	12.8089	13.4571	17.8453	13.9137
OsARF25	9.31503	13.0307	13.8536	7.56457	11.1547	13.9221
