# Supplementary material for: Spatial regulation of rice leaf morphology by miRNA-targets complexes during viral infection
Source: Research Square preprint supplement (doi:10.21203/rs.3.rs-5045268/v1), 2024-09-20
Supplement: Supplementary file 4 [file bcbb75a94745b86059e28f53.xlsx]

## Sheet: Sheet1
Table S5. Primers used in the paper
Primer name	Primer sequence (5'-3')	use
RRSV-CP-F	CACCAAACAACGCACTACCAT	qRT-PCR
RRSV-CP-R	AATCAGTCGGAGCAGCAAATC	qRT-PCR
OsEF1α-F	ACATTGCCGTCAAGTTTGCTG	qRT-PCR
OsEF1α-R	GAGAAACAAGCAGGAGGACGG	qRT-PCR
miR164-RT	gtcgtatccagtgcagggtccgaggtattcgcactggatacgacCGCACG	qRT-PCR
miR164-F	cacgTGGAGAAGCAGGGCA	qRT-PCR
miR156-RT	gtcgtatccagtgcagggtccgaggtattcgcactggatacgacGTGCTC	qRT-PCR
miR156-F	gcggcggTGACAGAAGAGAGT	qRT-PCR
miR319-RT	gtcgtatccagtgcagggtccgaggtattcgcactggatacgacGGGAGC	qRT-PCR
miR319-F	gcggcggTTGGACTGAAGGGT	qRT-PCR
miRNA-QR	AGTGCAGGGTCCGAGGTATT	qRT-PCR
osa-U6-18-qF	CGATAAAATTGGAACGATACAGA	qRT-PCR
osa-U6-99-qR	ATTTGGACCATTTCTCGATTTGT	qRT-PCR
OsCUC1-qF	CTTCTAGACGCGCATGGGG	qRT-PCR
OsCUC1-qR	CACCTCAGGGGAAATCCTGC	qRT-PCR
OsOMTN3-qF	TGCCTGAATTTGGCAGCTT	qRT-PCR
OsOMTN3-qR	ACACCTCACCCCCAATGGA	qRT-PCR
OsCUC3-QF	CGCTCCACCAAGGAGGAATGG	qRT-PCR
OsCUC3-QR	GACCGGAGGAAGGTCATGGAAG	qRT-PCR
OsTCP1-QF	CCTACCTGTTCAACGTGTCG	qRT-PCR
OsTCP1-QR	TCATCTGGTTGTCGGCTTC	qRT-PCR
OsSPL14-QF	GGAACGTAGCTCCTCATGGTCA	qRT-PCR
OsSPL14-QR	TGGCCCTGAAGAAGAGCTACCT	qRT-PCR
OsSPL17-QF	TGATCACCATGCGTTCAGCA	qRT-PCR
OsSPL17-QR	ACATCCACCTGAGGTGAGCTCA	qRT-PCR
OsCUC1-CL-F	ATGGAGCGGTGCAGCG	Clone
OsCUC1-CL-R	CTAGAAGCCCCATGCAAAGG	Clone
OsCUC3-CL-F	ATGGGGGACGCGCTGT	Clone
OsCUC3-CL-R	TCATGCGCCCCTGGG	Clone
OsTCP1-CL-F	ATGGGCGACGCCGG	Clone
OsTCP1-CL-R	TCAGTGGTGAGAAGCCGAGG	Clone
OsSPL14-CL-F	ATGGAGATGGCCAGTGGAGG	Clone
OsSPL14-CL-R	CTACAGAGACCAATCCATCGTGTT	Clone
OsSPL17-CL-F	ATGGCGACCGGCGGC	Clone
OsSPL17-CL-R	CTACAGAGACCAGTTCATGGCATT	Clone
OsCUC1-Xba Ⅰ-F	GCTCTAGA ATGGAGCGGTGCAG	Clone
OsCUC1-Sal Ⅰ-R	GCGGCCGTCGAC CTAGAAGCCCCATG	Clone
OsCUC3-Xma Ⅰ-F	TCCCCCCGGG ATGGGGGACGCGC	Clone
OsCUC3-Xba Ⅰ-R	GCTCTAGA TCATGCGCCCC	Clone
OsTCP1-Xma Ⅰ-F	TCCCCCCGGG ATGGGCGACGCCG	Clone
OsTCP1-Xba Ⅰ-R	GCTCTAGA TCAGTGGTGAGAAGCC	Clone
OsSPL14-Xma Ⅰ-F	TCCCCCCGGG ATGGAGATGGCCAGTGGAG	Clone
OsSPL14-Xba Ⅰ-R	GCTCTAGA CTACAGAGACCAATCCAT	Clone
OsSPL17-Xma Ⅰ-F	TCCCCCCGGG ATGGCGACCGGCG	Clone
OsSPL17-Xba Ⅰ-R	GCTCTAGA CTACAGAGACCAGTTCAT	Clone
OsCUC1-221-F	GGGGACAAGTTTGTACAAAAAAGCAGGCTTC ATGGAGCGGTGCAGCGTGCTG	Clone
OsCUC1-221-R	GGGGACCACTTTGTACAAGAAAGCTGGGTC CTAGAAGCCCCATGCAAAGGC	Clone
OsCUC3-221-F	GGGGACAAGTTTGTACAAAAAAGCAGGCTTC ATGGGGGACGCGCTGTG	Clone
OsCUC3-221-R	GGGGACCACTTTGTACAAGAAAGCTGGGTC TCATGCGCCCCTGGGC	Clone
OsTCP1-221-F	GGGGACAAGTTTGTACAAAAAAGCAGGCTTC ATGGGCGACGCCGGC	Clone
OsTCP1-221-R	GGGGACCACTTTGTACAAGAAAGCTGGGTC TCAGTGGTGAGAAGCCGAGGAG	Clone
OsSPL14-221-F	GGGGACAAGTTTGTACAAAAAAGCAGGCTTC ATGGAGATGGCCAGTGGAGG	Clone
OsSPL14-221-R	GGGGACCACTTTGTACAAGAAAGCTGGGTC CTACAGAGACCAATCCATCGTGTTG	Clone
OsSPL17-221-F	GGGGACAAGTTTGTACAAAAAAGCAGGCTTC ATGGCGACCGGCGGC	Clone
OsSPL17-221-R	GGGGACCACTTTGTACAAGAAAGCTGGGTC CTACAGAGACCAGTTCATGGCATTG	Clone
OsCUC1-U3T1F	ggcaGGTACTCGTGCATGACCCAC	Crispr
OsCUC1-U3T1R	aaacGTGGGTCATGCACGAGTACC	Crispr
OsCUC1-U6aT1F	gccgCCCACGGCTCGCACTTGTTC	Crispr
OsCUC1-U6aT1R	aaacGAACAAGTGCGAGCCGTGGG	Crispr
OsCUC3-U3T1F	ggcaGCACGCGCCGTTGAACACCT	Crispr
OsCUC3-U3T1R	aaacAGGTGTTCAACGGCGCGTGC	Crispr
OsCUC3-U6aT3F	gccgCGGAGTCAACGCCGGTCAAC	Crispr
OsCUC3-U6aT3R	aaacGTTGACCGGCGTTGACTCCG	Crispr
OsTCP1-U3T1F	ggcaCCTCCACGACCCCGAGTGT	Crispr
OsTCP1-U3T1R	aaacACACTCGGGGTCGTGGAGG	Crispr
OsTCP1-U6aT2F	gccgGCACATTGTGCGGTCGACA	Crispr
OsTCP1-U6aT2R	aaacTGTCGACCGCACAATGTGC	Crispr
OsSPL14-U3T1F	ggcaCTGCACTAGAGTGACCATG	Crispr
OsSPL14-U3T1R	aaacCATGGTCACTCTAGTGCAG	Crispr
OsSPL14-U6aT2F	gccgTCCAGGTGGATGTCTCGCAG	Crispr
OsSPL14-U6aT2R	aaacCTGCGAGACATCCACCTGGA	Crispr
OsSPL17-U3T1F	ggcaGTTCATGGCCCCCTTGCCAC	Crispr
OsSPL17-U3T1R	aaacGTGGCAAGGGGGCCATGAAC	Crispr
OsSPL17-U6aT2F	gccgTCGTCAACGGCCAGCGCCTT	Crispr
OsSPL17-U6aT2R	aaacAAGGCGCTGGCCGTTGACGA	Crispr
Pgs-GG2	AGCGTGggtctcGtcagGGTCCATCCACTCCAAGCTC	Crispr
Pps-GGL	TTCAGAggtctcTctcgACTAGTATGGAATCGGCAGCAAAGG	Crispr
Pps-GG2	TTCAGAggtctcTctgaCACTGGAATCGGCAGCAAAGG	Crispr
Pgs-GGR	AGCGTGggtctcGaccgACGCGTATCCATCCACTCCAAGCTC	Crispr
U-F	CTCCGTTTTACCTGTGGAATCG	Crispr
gRNA-R	CGGAGGAAAATTCCATCCAC	Crispr
Kana-F	CGGCTATGACTGGGCACAACAGACAAT	Detection
Kana-R	CTCGGCAGGAGCAAGGTGAGATGAC	Detection
OsCUC1-Cas9-F	GGTAGTTACTTGTTGCAGCAGCTG	Detection
OsCUC1-Cas9-R	TTGTGCCCTAGACCCCTCGT	Detection
OsCUC3-Cas9-F	CAAGCTAGGTACACACCTGAGTGC	Detection
OsCUC3-Cas9-R	ATTGTGTGACAGTGTGAGAGGGAC	Detection
OsTCP1-Cas9-F	GTCTTCCACCTCCAGCCGG	Detection
OsTCP1-Cas9-R	GCACGTCGAGCTTGTCGATG	Detection
OsSPL14-Cas9-F	AACTACTGGTTGCATTCGCTGAT	Detection
OsSPL14-Cas9-R	AGAACCTGTCCAGGGGCTTG	Detection
OsSPL17-Cas9-F	AAATGTGGCTCATGTTTGTCCTG	Detection
OsSPL17-Cas9-R	CGAGCTCGCCGGAGAAATG	Detection
OsCUC1-AD-F	gccatggaggccagtgaattcATGGAGCGGTGCAGCGTG	Y2H
OsCUC1-AD-R	cagctcgagctcgatggatccCTAGAAGCCCCATGCAAAGGC	Y2H
OsCUC1-BD-F	atggccatggaggccgaattcATGGAGCGGTGCAGCGTG	Y2H
OsCUC1-BD-R	ccgctgcaggtcgacggatccCTAGAAGCCCCATGCAAAGGC	Y2H
OsCUC3-AD-F	gccatggaggccagtgaattcATGGGGGACGCGCTGTGG	Y2H
OsCUC3-AD-R	cagctcgagctcgatggatccTCATGCGCCCCTGGGCAC	Y2H
OsCUC3-BD-F	atggccatggaggccgaattcATGGGGGACGCGCTGTGG	Y2H
OsCUC3-BD-R	ccgctgcaggtcgacggatccTCATGCGCCCCTGGGCAC	Y2H
OsTCP1-AD-F	gccatggaggccagtgaattcATGGGCGACGCCGGCGGC	Y2H
OsTCP1-AD-R	cagctcgagctcgatggatccTCAGTGGTGAGAAGCCGAGG	Y2H
OsTCP1-BD-F	atggccatggaggccgaattcATGGGCGACGCCGGCGGC	Y2H
OsTCP1-BD-R	ccgctgcaggtcgacggatccTCAGTGGTGAGAAGCCGAGG	Y2H
OsSPL14-AD-F	gccatggaggccagtgaattcATGGAGATGGCCAGTGGAGG	Y2H
OsSPL14-AD-R	cagctcgagctcgatggatccCTACAGAGACCAATCCATCGTGTT	Y2H
OsSPL14-BD-F	atggccatggaggccgaattcATGGAGATGGCCAGTGGAGG	Y2H
OsSPL14-BD-R	ccgctgcaggtcgacggatccCTACAGAGACCAATCCATCGTGTT	Y2H
OsSPL17-AD-F	gccatggaggccagtgaattcATGGCGACCGGCGGCAGC	Y2H
OsSPL17-AD-R	cagctcgagctcgatggatccCTACAGAGACCAGTTCATGGCATT	Y2H
OsSPL17-BD-F	atggccatggaggccgaattcATGGCGACCGGCGGCAGC	Y2H
OsSPL17-BD-R	ccgctgcaggtcgacggatccCTACAGAGACCAGTTCATGGCATT	Y2H
