# Supplementary material for: Spatial regulation of rice leaf morphology by miRNA-targets complexes during viral infection
Source: Research Square preprint supplement (doi:10.21203/rs.3.rs-5045268/v1), 2024-09-20
Supplement: Supplementary file 5 [file f0f6b77f4ddb3cf4dbbbcf7c.xlsx]

## Sheet: Sheet1
Table S3. FPKM data from RNA sequencing results, relative to Fig. S2b
gene	Mock 7dpi	Mock 14dpi	Mock 21dpi	RRSV 7dpi	RRSV 14dpi	RRSV 21dpi
OsNAC103	6.41848	8.95572	13.2676	14.0636	17.5027	32.2635
OsNAC15	4.98067	9.3936	21.9711	8.79402	10.4262	47.7071
OsNAC05	54.3103	43.3	46.6162	89.6877	51.5135	71.8531
OsNAC1	34.5032	33.2975	16.1058	7.24146	23.2857	18.6913
OsNAC4	18.873	30.3437	23.0993	6.39454	15.2995	40.9422
OsNAC095	18.5144	18.6862	10.8936	6.41485	17.1724	8.52472
OsNAC8	53.2387	46.272	47.2077	19.8019	47.7082	25.9598
OsNAC6	88.2876	111.686	233.346	33.1959	99.4611	206.665
OsNAC3	49.3426	41.8252	72.8541	20.7576	46.0723	47.2613
OsNAC016	0.096097	0.076649	0.073161	0.037942	1.15161	0.568023
OsNAC121	1.12328	1.69091	2.96628	1.93637	26.2055	14.4654
Os07g0138200	0	0.086567	0.060613	0	1.00957	0.85229
OsNAC5	8.0488	6.27959	76.685	9.63557	13.6573	65.7826
OsNAC58	3.02014	5.63364	3.0472	3.60094	12.2949	14.8253
OsNAC77	0.357798	0.854671	3.32866	0.428158	2.10829	4.12488
OsNAC45	0.984006	1.44172	1.21162	0.967399	3.60358	2.92539
OsBET1	1.07531	0.996771	1.39448	1.52287	2.8113	2.8905
OsRIM1	2.62686	2.01214	0.849703	2.34108	7.82551	2.22911
OsNAC55	1.68911	3.29897	0.813847	2.7987	14.5777	18.3611
OsNAC109	0.332656	0.490864	0.110824	0.352014	3.27239	0.46566
OsNAC51	1.36787	3.02182	2.86702	1.43781	0.812068	4.93944
OsNAC29	1.68578	3.06892	2.95209	2.29023	1.48621	4.00047
OsSWN1	17.5886	18.0214	31.4476	15.3608	15.8652	10.1639
OsSND2	13.0373	22.3873	26.1759	11.2177	16.2623	7.84879
OsPCF5; OsTCP1	4.00168	4.9659	1.55376	4.29535	2.60191	0.722451
OsPCF7	6.92634	8.994	6.40117	7.36826	4.1483	3.61381
OsTCP2	10.4951	9.39001	7.00835	14.2216	9.48752	2.77111
OsTCP3	12.7448	18.1453	9.10461	14.7081	20.5808	17.3342
OsTCP4	5.2896	8.3099	1.10171	8.62621	3.70814	0.610073
OsTCP5	5.78785	5.30988	3.29988	4.85849	4.80962	0.769467
OsTCP6	0	0	0	0	0	0
OsTB1; FC1	0.039231	0	0	0.020853	0	0.028702
OsPCF6; OsTCP8	2.83955	3.00795	0.599176	2.20657	3.00739	0.771112
PCF1	2.37408	2.70408	0.890516	2.96391	2.18209	0.627796
OsTCP10	0.014641	0.208241	0	0.139749	0.042812	0.002019
OsTCP11	9.2961	12.8405	8.73911	10.2839	5.65439	4.278
OsTCP19	22.2042	20.1973	15.862	25.9809	18.2358	6.31988
OsTCP13	0	0	0	0	0	0
OsTCP21; OsTCP14	5.55161	9.36848	4.81334	5.40538	7.23675	8.62772
OsTCP15; TIG1	0	0	0	0	0	0
PCF2	51.1632	43.1885	37.9244	54.6572	36.258	21.997
REP1; OsTCP17	0	0	0	0.065166	0	0
OsTCP18	0.212991	0.33084	0.319146	0.257627	0.221676	0.673422
PCF3; OsTCP19	3.61398	9.15215	0.380403	7.30495	8.87253	2.281
OsTCP20	0	0	0.003626	0	0	0
OsTCP21	3.39822	3.42599	2.25892	4.57524	3.50998	1.10389
OsPCF8; OsTCP22	11.4319	8.11787	3.93879	14.4079	6.60565	1.13573
SPL1	21.2552	19.4488	24.743	14.0752	22.2657	33.4005
SPL2	30.1637	32.5874	145.976	27.6019	18.5429	118.324
SPL3	12.7593	14.6136	5.62261	14.369	13.3165	7.37679
SPL4	12.6637	11.445	6.80565	16.4171	10.3286	5.99596
SPL5	0	0.042526	0	0	0	0
SPL6	18.9549	18.8037	21.5227	15.4668	17.6045	21.3386
SPL7	0.241574	0.531433	0.484665	0.460312	0.436528	0.081001
SPL8	4.43832	8.21731	4.94495	5.53871	5.58584	4.36302
SPL9	24.8433	25.5609	30.3728	18.1987	23.4541	34.5198
SPL10	0	0.221702	0	0	0	0.040312
SPL11	13.1974	11.4752	11.5264	9.26791	8.83309	10.1236
SPL12	27.9045	34.5811	28.7309	28.3389	20.7093	25.844
SPL13	10.5598	12.1437	6.38563	7.60207	8.04463	2.05442
SPL14	1.72494	2.0199	1.66746	1.25361	1.36145	1.46748
SPL15	95.1425	85.4896	108.375	71.5009	71.9851	92.1737
SPL16	0.338059	0.475643	0.126728	0.252137	0.135586	0.089355
SPL17	2.8039	4.63675	2.39311	1.20614	3.41217	0.43706
SPL18	3.56481	4.55464	1.31474	3.99845	2.22628	1.0407
SPL19	1.75479	2.76456	1.04505	1.54762	1.92496	0.636527
